# Supplementary material
Source: PubMed Central journal article supplement (PMC4925320)
Supplement: NIHMS778816-supplement-Supplemental_Digital_Content.pdf [file NIHMS778816-supplement-Supplemental_Digital_Content.pdf]

Supplemental Digital Content (SDC)

Table 1: Multiple regression analysis, allowing for opioids, ondansetron, patient BMI, PPI, esophagitis and age group (<1 vs. ≥1):

All patients:

| Outcome                                 | Dataset       | Sedation           | No sedation        | p-value |
|-----------------------------------------|---------------|--------------------|--------------------|---------|
| % Time pH < 4                           | Full data     | 0.71 ( 0.34, 1.50) | 0.65 ( 0.21, 1.99) | 0.892   |
|                                         | Abridged data | 0.56 ( 0.24, 1.29) | 0.56 ( 0.16, 2.01) | 0.990   |
|                                         | First 4 hours | 0.30 ( 0.12, 0.74) | 0.28 ( 0.07, 1.13) | 0.951   |
| Number of acid reflux episodes/hour     | Full data     | 0.44 ( 0.26, 0.74) | 0.37 ( 0.17, 0.79) | 0.708   |
|                                         | Abridged data | 0.38 ( 0.22, 0.65) | 0.40 ( 0.18, 0.91) | 0.905   |
|                                         | First 4 hours | 0.33 ( 0.16, 0.72) | 0.25 ( 0.08, 0.81) | 0.704   |
| Number of non-acid reflux episodes/hour | Full data     | 1.03 ( 0.76, 1.41) | 0.63 ( 0.39, 1.01) | 0.110   |
|                                         | Abridged data | 1.01 ( 0.70, 1.46) | 0.56 ( 0.32, 0.99) | 0.114   |
|                                         | First 4 hours | 1.18 ( 0.68, 2.03) | 0.60 ( 0.26, 1.38) | 0.215   |
| Total number of reflux episodes/hour    | Full data     | 1.83 ( 1.45, 2.32) | 1.78 ( 1.24, 2.54) | 0.895   |
|                                         | Abridged data | 1.81 ( 1.42, 2.31) | 1.80 ( 1.24, 2.60) | 0.976   |
|                                         | First 4 hours | 2.14 ( 1.54, 2.97) | 1.93 ( 1.17, 3.18) | 0.752   |

Patients aged ≥1:

| Outcome                                 | Dataset       | Anesthesia         | No sedation        | p-value |
|-----------------------------------------|---------------|--------------------|--------------------|---------|
| % Time pH < 4                           | Full data     | 0.82 ( 0.32, 2.10) | 1.34 ( 0.49, 3.65) | 0.566   |
|                                         | Abridged data | 0.49 ( 0.16, 1.44) | 0.96 ( 0.30, 3.09) | 0.487   |
|                                         | First 4 hours | 0.50 ( 0.15, 1.62) | 0.66 ( 0.19, 2.34) | 0.789   |
| Number of acid reflux episodes/hour     | Full data     | 0.54 ( 0.30, 0.97) | 0.87 ( 0.46, 1.63) | 0.369   |
|                                         | Abridged data | 0.38 ( 0.19, 0.75) | 0.87 ( 0.42, 1.79) | 0.184   |
|                                         | First 4 hours | 0.53 ( 0.20, 1.41) | 0.58 ( 0.20, 1.66) | 0.920   |
| Number of non-acid reflux episodes/hour | Full data     | 0.76 ( 0.51, 1.15) | 0.55 ( 0.35, 0.85) | 0.371   |
|                                         | Abridged data | 0.71 ( 0.42, 1.20) | 0.46 ( 0.26, 0.80) | 0.356   |
|                                         | First 4 hours | 0.91 ( 0.41, 2.03) | 0.67 ( 0.28, 1.58) | 0.675   |
| Total number of reflux                  | Full data     | 1.50 ( 1.11, 2.03) | 1.89 ( 1.37, 2.60) | 0.403   |

| <b>Outcome</b> | <b>Dataset</b> | <b>Anesthesia</b>  | <b>No sedation</b> | <b>p-value</b> |
|----------------|----------------|--------------------|--------------------|----------------|
|                | Abridged data  | 1.41 ( 1.00, 1.98) | 1.72 ( 1.19, 2.47) | 0.522          |
|                | First 4 hours  | 1.95 ( 1.31, 2.89) | 2.68 ( 1.75, 4.10) | 0.375          |

Table 2: Multiple regression analysis of differences, allowing for opioids, ondansetron, patient BMI, PPI, esophagitis and age group (<1 vs. ≥1):

All patients:

| Outcome                                 | Mean difference     | p-value |
|-----------------------------------------|---------------------|---------|
| % Time pH < 4                           | 1.51 (-6.36, 9.39)  | 0.707   |
| Number of acid reflux episodes/hour     | -0.19 (-2.03, 1.65) | 0.843   |
| Number of non-acid reflux episodes/hour | -0.04 (-2.36, 2.28) | 0.973   |
| Total number of reflux episodes/hour    | -0.17 (-2.94, 2.59) | 0.904   |

Patients aged ≥1:

| Outcome                                 | Mean difference     | p-value |
|-----------------------------------------|---------------------|---------|
| % Time pH < 4                           | 4.66 (-4.12, 13.43) | 0.302   |
| Number of acid reflux episodes/hour     | 0.09 (-1.91, 2.09)  | 0.930   |
| Number of non-acid reflux episodes/hour | 1.91 (-0.10, 3.93)  | 0.067   |
| Total number of reflux episodes/hour    | 2.08 (-0.77, 4.94)  | 0.157   |

All patients, within each sedation group:

| Outcome                                 | Sedation Group | Mean difference     | p-value |
|-----------------------------------------|----------------|---------------------|---------|
| % Time pH < 4                           | Anesthesia     | -0.83 (-2.85, 1.18) | 0.421   |
|                                         | No Sedation    | 1.27 (-1.79, 4.33)  | 0.418   |
| Number of acid reflux episodes/hour     | Anesthesia     | 0.16 (-0.32, 0.63)  | 0.519   |
|                                         | No Sedation    | 0.21 (-0.50, 0.93)  | 0.561   |
| Number of non-acid reflux episodes/hour | Anesthesia     | 0.32 (-0.28, 0.91)  | 0.298   |
|                                         | No Sedation    | 0.33 (-0.57, 1.23)  | 0.480   |
| Total number of reflux episodes/hour    | Anesthesia     | 0.48 (-0.23, 1.18)  | 0.192   |
|                                         | No Sedation    | 0.52 (-0.55, 1.60)  | 0.342   |

Patients aged ≥1, within each sedation group:

| Outcome       | Sedation Group | Mean difference     | p-value |
|---------------|----------------|---------------------|---------|
| % Time pH < 4 | Anesthesia     | -2.10 (-5.15, 0.95) | 0.181   |

| Outcome                                 | Sedation Group | Mean difference     | p-value      |
|-----------------------------------------|----------------|---------------------|--------------|
|                                         | No Sedation    | 2.61 (-0.66, 5.88)  | 0.123        |
| Number of acid reflux episodes/hour     | Anesthesia     | 0.41 (-0.28, 1.11)  | 0.246        |
|                                         | No Sedation    | 0.38 (-0.36, 1.12)  | 0.320        |
| Number of non-acid reflux episodes/hour | Anesthesia     | -0.00 (-0.70, 0.70) | 0.999        |
|                                         | No Sedation    | 1.11 ( 0.36, 1.86)  | <b>0.005</b> |
| Total number of reflux episodes/hour    | Anesthesia     | 0.41 (-0.58, 1.40)  | 0.419        |
|                                         | No Sedation    | 1.49 ( 0.42, 2.55)  | <b>0.008</b> |

Table 3: Univariate and multiple regression analysis for the effect of PPI on each outcome overall and for patients aged  $\geq 1$ , and within sedation group.

Univariate analysis of PPI in all patients:

| Outcome                                 | Dataset       | PPI                | No PPI             | p-value |
|-----------------------------------------|---------------|--------------------|--------------------|---------|
| % Time pH < 4                           | Full data     | 1.26 ( 0.86, 1.85) | 1.53 ( 0.90, 2.58) | 0.552   |
|                                         | Abridged data | 1.15 ( 0.75, 1.76) | 1.59 ( 0.90, 2.80) | 0.354   |
|                                         | First 4 hours | 2.24 ( 1.53, 3.27) | 2.07 ( 1.21, 3.54) | 0.817   |
| Number of acid reflux episodes/hour     | Full data     | 0.71 ( 0.54, 0.94) | 0.71 ( 0.49, 1.04) | 0.989   |
|                                         | Abridged data | 0.56 ( 0.41, 0.78) | 0.59 ( 0.38, 0.91) | 0.853   |
|                                         | First 4 hours | 1.30 ( 0.98, 1.72) | 1.29 ( 0.95, 1.75) | 0.980   |
| Number of non-acid reflux episodes/hour | Full data     | 1.13 ( 0.87, 1.46) | 0.62 ( 0.46, 0.84) | 0.004   |
|                                         | Abridged data | 1.13 ( 0.88, 1.45) | 0.59 ( 0.43, 0.82) | 0.002   |
|                                         | First 4 hours | 1.46 ( 1.14, 1.85) | 1.19 ( 0.85, 1.65) | 0.317   |
| Total number of reflux episodes/hour    | Full data     | 2.25 ( 1.92, 2.62) | 1.61 ( 1.26, 2.06) | 0.024   |
|                                         | Abridged data | 2.24 ( 1.94, 2.58) | 1.38 ( 1.04, 1.83) | 0.003   |
|                                         | First 4 hours | 2.43 ( 1.89, 3.12) | 2.34 ( 1.80, 3.04) | 0.830   |

Univariate analysis of PPI in patients aged  $\geq 1$ :

| Outcome                                 | Dataset       | PPI                | No PPI             | p-value |
|-----------------------------------------|---------------|--------------------|--------------------|---------|
| % Time pH < 4                           | Full data     | 1.35 ( 0.87, 2.07) | 1.61 ( 0.94, 2.75) | 0.595   |
|                                         | Abridged data | 1.19 ( 0.73, 1.95) | 1.68 ( 0.93, 3.01) | 0.366   |
|                                         | First 4 hours | 2.16 ( 1.40, 3.34) | 2.24 ( 1.40, 3.59) | 0.904   |
| Number of acid reflux episodes/hour     | Full data     | 0.74 ( 0.53, 1.02) | 0.75 ( 0.49, 1.15) | 0.944   |
|                                         | Abridged data | 0.66 ( 0.46, 0.94) | 0.61 ( 0.38, 0.99) | 0.805   |
|                                         | First 4 hours | 1.36 ( 0.99, 1.86) | 1.38 ( 0.99, 1.92) | 0.944   |
| Number of non-acid reflux episodes/hour | Full data     | 0.92 ( 0.68, 1.24) | 0.56 ( 0.42, 0.74) | 0.016   |
|                                         | Abridged data | 0.89 ( 0.67, 1.18) | 0.53 ( 0.39, 0.73) | 0.014   |
|                                         | First 4 hours | 1.49 ( 1.14, 1.95) | 1.10 ( 0.79, 1.54) | 0.150   |

| Outcome                              | Dataset       | PPI                | No PPI             | p-value |
|--------------------------------------|---------------|--------------------|--------------------|---------|
| Total number of reflux episodes/hour | Full data     | 2.11 ( 1.79, 2.50) | 1.57 ( 1.22, 2.03) | 0.053   |
|                                      | Abridged data | 2.03 ( 1.72, 2.38) | 1.32 ( 0.97, 1.79) | 0.015   |
|                                      | First 4 hours | 2.65 ( 2.01, 3.48) | 2.34 ( 1.83, 2.99) | 0.499   |

Univariate analysis of PPI within sedation group, in all patients:

| Outcome                                 | Dataset       | Sedation Group | PPI                | No PPI             | p-value |
|-----------------------------------------|---------------|----------------|--------------------|--------------------|---------|
| % Time pH < 4                           | Full data     | Anesthesia     | 0.49 ( 0.24, 0.97) | 1.08 ( 0.40, 2.94) | 0.204   |
|                                         |               | No Sedation    | 0.68 ( 0.31, 1.49) | 1.57 ( 0.63, 3.94) | 0.178   |
|                                         | Abridged data | Anesthesia     | 0.42 ( 0.19, 0.91) | 0.77 ( 0.25, 2.36) | 0.388   |
|                                         |               | No Sedation    | 0.48 ( 0.20, 1.16) | 1.01 ( 0.36, 2.84) | 0.286   |
|                                         | First 4 hours | Anesthesia     | 0.28 ( 0.12, 0.69) | 0.40 ( 0.11, 1.47) | 0.669   |
|                                         |               | No Sedation    | 0.52 ( 0.19, 1.44) | 1.16 ( 0.35, 3.83) | 0.317   |
| Number of acid reflux episodes/hour     | Full data     | Anesthesia     | 0.49 ( 0.30, 0.79) | 0.51 ( 0.25, 1.03) | 0.928   |
|                                         |               | No Sedation    | 0.44 ( 0.25, 0.76) | 0.96 ( 0.50, 1.83) | 0.077   |
|                                         | Abridged data | Anesthesia     | 0.38 ( 0.23, 0.63) | 0.45 ( 0.21, 0.93) | 0.730   |
|                                         |               | No Sedation    | 0.43 ( 0.24, 0.77) | 0.75 ( 0.38, 1.47) | 0.224   |
|                                         | First 4 hours | Anesthesia     | 0.41 ( 0.20, 0.85) | 0.25 ( 0.09, 0.73) | 0.461   |
|                                         |               | No Sedation    | 0.35 ( 0.15, 0.80) | 1.09 ( 0.42, 2.88) | 0.084   |
| Number of non-acid reflux episodes/hour | Full data     | Anesthesia     | 1.09 ( 0.79, 1.52) | 0.63 ( 0.39, 1.01) | 0.062   |
|                                         |               | No Sedation    | 1.17 ( 0.81, 1.70) | 0.62 ( 0.40, 0.96) | 0.032   |
|                                         | Abridged data | Anesthesia     | 1.09 ( 0.75, 1.59) | 0.44 ( 0.26, 0.76) | 0.009   |
|                                         |               | No Sedation    | 1.18 ( 0.77, 1.81) | 0.49 ( 0.30, 0.81) | 0.011   |
|                                         | First 4 hours | Anesthesia     | 1.41 ( 0.84, 2.37) | 0.57 ( 0.27, 1.22) | 0.057   |
|                                         |               | No Sedation    | 0.85 ( 0.47, 1.55) | 0.80 ( 0.40, 1.61) | 0.894   |
| Total number of reflux episodes/hour    | Full data     | Anesthesia     | 2.16 ( 1.74, 2.67) | 1.27 ( 0.93, 1.73) | 0.007   |
|                                         |               | No Sedation    | 2.36 ( 1.85, 3.02) | 1.97 ( 1.48, 2.62) | 0.342   |
|                                         | Abridged data | Anesthesia     | 2.14 ( 1.71, 2.67) | 1.13 ( 0.82, 1.56) | 0.002   |
|                                         |               | No Sedation    | 2.38 ( 1.84, 3.06) | 1.64 ( 1.22, 2.21) | 0.065   |

| Outcome | Dataset       | Sedation Group | PPI                | No PPI             | p-value |
|---------|---------------|----------------|--------------------|--------------------|---------|
|         |               |                |                    |                    |         |
|         | First 4 hours | Anesthesia     | 2.47 ( 1.84, 3.32) | 1.57 ( 1.02, 2.42) | 0.093   |
|         |               | No Sedation    | 2.38 ( 1.70, 3.34) | 3.27 ( 2.20, 4.86) | 0.235   |

Univariate analysis of PPI within sedation group, in patients aged  $\geq 1$ :

| Outcome                                 | Dataset       | Sedation Group | PPI                | No PPI             | p-value |
|-----------------------------------------|---------------|----------------|--------------------|--------------------|---------|
|                                         |               |                |                    |                    |         |
| % Time pH < 4                           | Full data     | Anesthesia     | 0.58 ( 0.28, 1.19) | 0.95 ( 0.34, 2.64) | 0.437   |
|                                         |               | No Sedation    | 1.16 ( 0.47, 2.82) | 1.79 ( 0.73, 4.36) | 0.502   |
|                                         | Abridged data | Anesthesia     | 0.59 ( 0.25, 1.37) | 0.60 ( 0.18, 1.99) | 0.975   |
|                                         |               | No Sedation    | 0.65 ( 0.23, 1.87) | 1.10 ( 0.39, 3.14) | 0.493   |
|                                         | First 4 hours | Anesthesia     | 0.35 ( 0.14, 0.90) | 0.42 ( 0.11, 1.59) | 0.825   |
|                                         |               | No Sedation    | 1.47 ( 0.46, 4.68) | 1.19 ( 0.37, 3.79) | 0.802   |
| Number of acid reflux episodes/hour     | Full data     | Anesthesia     | 0.56 ( 0.36, 0.88) | 0.48 ( 0.26, 0.91) | 0.713   |
|                                         |               | No Sedation    | 0.87 ( 0.50, 1.53) | 1.05 ( 0.60, 1.84) | 0.643   |
|                                         | Abridged data | Anesthesia     | 0.46 ( 0.28, 0.78) | 0.40 ( 0.19, 0.83) | 0.745   |
|                                         |               | No Sedation    | 0.69 ( 0.36, 1.32) | 0.85 ( 0.45, 1.62) | 0.654   |
|                                         | First 4 hours | Anesthesia     | 0.47 ( 0.22, 1.01) | 0.28 ( 0.10, 0.82) | 0.444   |
|                                         |               | No Sedation    | 0.91 ( 0.35, 2.32) | 1.09 ( 0.43, 2.80) | 0.784   |
| Number of non-acid reflux episodes/hour | Full data     | Anesthesia     | 0.86 ( 0.61, 1.22) | 0.54 ( 0.33, 0.88) | 0.131   |
|                                         |               | No Sedation    | 1.02 ( 0.66, 1.58) | 0.57 ( 0.37, 0.88) | 0.065   |
|                                         | Abridged data | Anesthesia     | 0.85 ( 0.56, 1.29) | 0.36 ( 0.20, 0.66) | 0.025   |
|                                         |               | No Sedation    | 0.96 ( 0.57, 1.62) | 0.44 ( 0.26, 0.74) | 0.041   |
|                                         | First 4 hours | Anesthesia     | 1.42 ( 0.76, 2.65) | 0.42 ( 0.18, 1.03) | 0.032   |
|                                         |               | No Sedation    | 0.67 ( 0.31, 1.45) | 0.76 ( 0.35, 1.64) | 0.823   |
| Total number of reflux episodes/hour    | Full data     | Anesthesia     | 1.97 ( 1.57, 2.47) | 1.14 ( 0.83, 1.57) | 0.008   |
|                                         |               | No Sedation    | 2.35 ( 1.78, 3.10) | 2.00 ( 1.51, 2.64) | 0.422   |
|                                         | Abridged data | Anesthesia     | 1.94 ( 1.51, 2.49) | 1.00 ( 0.70, 1.43) | 0.004   |

| Outcome | Dataset       | Sedation Group | PPI                | No PPI             | p-value |
|---------|---------------|----------------|--------------------|--------------------|---------|
|         |               | No Sedation    | 2.17 ( 1.59, 2.96) | 1.63 ( 1.20, 2.22) | 0.206   |
|         | First 4 hours | Anesthesia     | 2.51 ( 1.87, 3.37) | 1.44 ( 0.95, 2.18) | 0.036   |
|         |               | No Sedation    | 2.86 ( 1.99, 4.12) | 3.39 ( 2.35, 4.87) | 0.525   |

Multiple regression analysis of PPI within each sedation group:

| Outcome                                 | Dataset       | Sedation Group | PPI                | No PPI             | p-value |
|-----------------------------------------|---------------|----------------|--------------------|--------------------|---------|
| % Time pH < 4                           | Full data     | Sedation       | 0.49 ( 0.21, 1.15) | 1.09 ( 0.37, 3.22) | 0.207   |
|                                         |               | No Sedation    | 0.48 ( 0.15, 1.55) | 0.85 ( 0.21, 3.47) | 0.367   |
|                                         | Abridged data | Sedation       | 0.42 ( 0.16, 1.10) | 0.76 ( 0.22, 2.58) | 0.409   |
|                                         |               | No Sedation    | 0.44 ( 0.12, 1.65) | 0.72 ( 0.15, 3.54) | 0.483   |
|                                         | First 4 hours | Sedation       | 0.28 ( 0.10, 0.82) | 0.30 ( 0.08, 1.16) | 0.932   |
|                                         |               | No Sedation    | 0.25 ( 0.06, 1.06) | 0.33 ( 0.06, 1.90) | 0.705   |
| Number of acid reflux episodes/hour     | Full data     | Sedation       | 0.42 ( 0.23, 0.76) | 0.43 ( 0.20, 0.91) | 0.961   |
|                                         |               | No Sedation    | 0.29 ( 0.13, 0.66) | 0.49 ( 0.19, 1.29) | 0.239   |
|                                         | Abridged data | Sedation       | 0.35 ( 0.19, 0.64) | 0.41 ( 0.19, 0.89) | 0.723   |
|                                         |               | No Sedation    | 0.35 ( 0.15, 0.82) | 0.48 ( 0.17, 1.31) | 0.504   |
|                                         | First 4 hours | Sedation       | 0.43 ( 0.18, 1.03) | 0.21 ( 0.07, 0.63) | 0.268   |
|                                         |               | No Sedation    | 0.20 ( 0.06, 0.65) | 0.39 ( 0.09, 1.64) | 0.296   |
| Number of non-acid reflux episodes/hour | Full data     | Sedation       | 1.39 ( 0.97, 2.00) | 0.76 ( 0.48, 1.20) | 0.027   |
|                                         |               | No Sedation    | 0.83 ( 0.50, 1.36) | 0.49 ( 0.27, 0.88) | 0.052   |
|                                         | Abridged data | Sedation       | 1.66 ( 1.08, 2.56) | 0.59 ( 0.34, 1.02) | 0.002   |
|                                         |               | No Sedation    | 0.86 ( 0.48, 1.55) | 0.38 ( 0.19, 0.77) | 0.013   |
|                                         | First 4 hours | Sedation       | 1.84 ( 0.99, 3.41) | 0.65 ( 0.30, 1.42) | 0.025   |
|                                         |               | No Sedation    | 0.67 ( 0.28, 1.57) | 0.62 ( 0.22, 1.72) | 0.874   |
| Total number of reflux episodes/hour    | Full data     | Sedation       | 2.35 ( 1.80, 3.08) | 1.34 ( 0.95, 1.88) | 0.006   |
|                                         |               | No Sedation    | 1.98 ( 1.37, 2.86) | 1.69 ( 1.08, 2.62) | 0.424   |
|                                         | Abridged data | Sedation       | 2.47 ( 1.87, 3.26) | 1.26 ( 0.89, 1.79) | 0.002   |
|                                         |               | No Sedation    | 2.17 ( 1.48, 3.18) | 1.56 ( 0.99, 2.46) | 0.115   |



| Outcome | Dataset       | Sedation Group | PPI                | No PPI             | p-value |
|---------|---------------|----------------|--------------------|--------------------|---------|
|         | First 4 hours | Sedation       | 2.71 ( 1.86, 3.93) | 1.50 ( 0.93, 2.40) | 0.034   |
|         |               | No Sedation    | 1.86 ( 1.11, 3.10) | 2.22 ( 1.21, 4.09) | 0.518   |

Multiple regression analysis of PPI within each sedation group, in patients aged  $\geq 1$ :

| Outcome                                 | Dataset       | Sedation Group | PPI                | No PPI             | p-value |
|-----------------------------------------|---------------|----------------|--------------------|--------------------|---------|
| % Time pH < 4                           | Full data     | Sedation       | 0.60 ( 0.22, 1.65) | 1.11 ( 0.30, 4.07) | 0.350   |
|                                         |               | No Sedation    | 0.97 ( 0.29, 3.23) | 1.86 ( 0.56, 6.19) | 0.325   |
|                                         | Abridged data | Sedation       | 0.43 ( 0.14, 1.39) | 0.44 ( 0.10, 1.99) | 0.977   |
|                                         |               | No Sedation    | 0.66 ( 0.16, 2.68) | 1.47 ( 0.37, 5.89) | 0.303   |
|                                         | First 4 hours | Sedation       | 0.50 ( 0.14, 1.78) | 0.53 ( 0.10, 2.69) | 0.952   |
|                                         |               | No Sedation    | 0.71 ( 0.16, 3.25) | 0.61 ( 0.13, 2.76) | 0.851   |
| Number of acid reflux episodes/hour     | Full data     | Sedation       | 0.54 ( 0.29, 1.01) | 0.48 ( 0.21, 1.08) | 0.779   |
|                                         |               | No Sedation    | 0.75 ( 0.35, 1.60) | 1.03 ( 0.48, 2.19) | 0.455   |
|                                         | Abridged data | Sedation       | 0.39 ( 0.19, 0.81) | 0.33 ( 0.13, 0.84) | 0.718   |
|                                         |               | No Sedation    | 0.75 ( 0.32, 1.79) | 1.03 ( 0.44, 2.46) | 0.506   |
|                                         | First 4 hours | Sedation       | 0.64 ( 0.23, 1.84) | 0.35 ( 0.09, 1.36) | 0.375   |
|                                         |               | No Sedation    | 0.53 ( 0.15, 1.87) | 0.67 ( 0.19, 2.32) | 0.743   |
| Number of non-acid reflux episodes/hour | Full data     | Sedation       | 0.98 ( 0.63, 1.53) | 0.64 ( 0.36, 1.12) | 0.132   |
|                                         |               | No Sedation    | 0.77 ( 0.45, 1.30) | 0.38 ( 0.23, 0.65) | 0.020   |
|                                         | Abridged data | Sedation       | 1.13 ( 0.64, 2.00) | 0.45 ( 0.22, 0.94) | 0.015   |
|                                         |               | No Sedation    | 0.75 ( 0.38, 1.48) | 0.28 ( 0.14, 0.54) | 0.009   |
|                                         | First 4 hours | Sedation       | 1.46 ( 0.62, 3.41) | 0.42 ( 0.14, 1.24) | 0.026   |
|                                         |               | No Sedation    | 0.72 ( 0.26, 2.00) | 0.67 ( 0.24, 1.84) | 0.886   |
| Total number of reflux episodes/hour    | Full data     | Sedation       | 1.87 ( 1.36, 2.57) | 1.09 ( 0.72, 1.64) | 0.010   |
|                                         |               | No Sedation    | 2.06 ( 1.41, 3.01) | 1.77 ( 1.21, 2.58) | 0.470   |
|                                         | Abridged data | Sedation       | 1.88 ( 1.31, 2.70) | 0.95 ( 0.60, 1.52) | 0.005   |
|                                         |               | No Sedation    | 2.01 ( 1.30, 3.10) | 1.50 ( 0.97, 2.31) | 0.220   |

| <b>Outcome</b> | <b>Dataset</b> | <b>Sedation Group</b> | <b>PPI</b>         | <b>No PPI</b>      | <b>p-value</b> |
|----------------|----------------|-----------------------|--------------------|--------------------|----------------|
|                | First 4 hours  | Sedation              | 2.40 ( 1.59, 3.64) | 1.28 ( 0.75, 2.19) | 0.022          |
|                |                | No Sedation           | 2.55 ( 1.55, 4.18) | 2.96 ( 1.81, 4.85) | 0.581          |
